# Supplementary material for: Zinc oxide nanoflake/reduced graphene oxide nanocomposite-based dual-acting electrodes for solar-assisted supercapacitor applications
Source: Royal Society of Chemistry journal article supplement (doi:10.1039/d4ya00253a), 2024-01-01
Supplement: d4ya00253a1.pdf [file d4ya00253a1.pdf]

## Supplementary File

### **Zinc oxide nanoflake/reduced graphene oxide nanocomposite-based dual-acting electrodes for solar-assisted supercapacitor applications**

Cigdem Tuc Altaf,<sup>[a]</sup> Tuluhan Olcayto Colak,<sup>[b]</sup> Arpad Mihai Rostas,<sup>[c]</sup> Crina Socaci,<sup>[c]</sup> Mihaela Diana Lazar,<sup>[c]</sup> Lucian Barbu Tudoran,<sup>[c]</sup> Mohamad Hasan Aleinawi,<sup>[d]</sup> Feray Bakan Misirlioglu,<sup>[e]</sup> Ipek Deniz Yildirim,<sup>[d]</sup> Emre Erdem,<sup>[d]</sup> Nurdan Demirci Sankir,<sup>[a,b]\*</sup> Mehmet Sankir <sup>[a,b]\*</sup>

<sup>[a]</sup> Department of Materials Science and Nanotechnology Engineering, TOBB University of Economics and Technology, Sogutozu Caddesi No 43 Sogutozu 06560 Ankara, Turkey

<sup>[b]</sup> Micro and Nanotechnology Graduate Program, TOBB University of Economics and Technology, Sogutozu Caddesi No 43 Sogutozu 06560 Ankara, Turkey

<sup>[c]</sup> National Institute for Research and Development of Isotopic and Molecular Technologies- INCDTIM, 67-103 Donat, 400293 Cluj-Napoca, Romania

<sup>[d]</sup> Faculty of Engineering and Natural Sciences, Sabanci University, Orhanli, Tuzla, 34956, Istanbul, Turkey

<sup>[e]</sup> Sabanci University Nanotechnology Research and Application Center, 34956, Istanbul, Turkey

**Corresponding authors:** \* [nsankir@etu.edu.tr](mailto:nsankir@etu.edu.tr); \* [msankir@etu.edu.tr](mailto:msankir@etu.edu.tr)

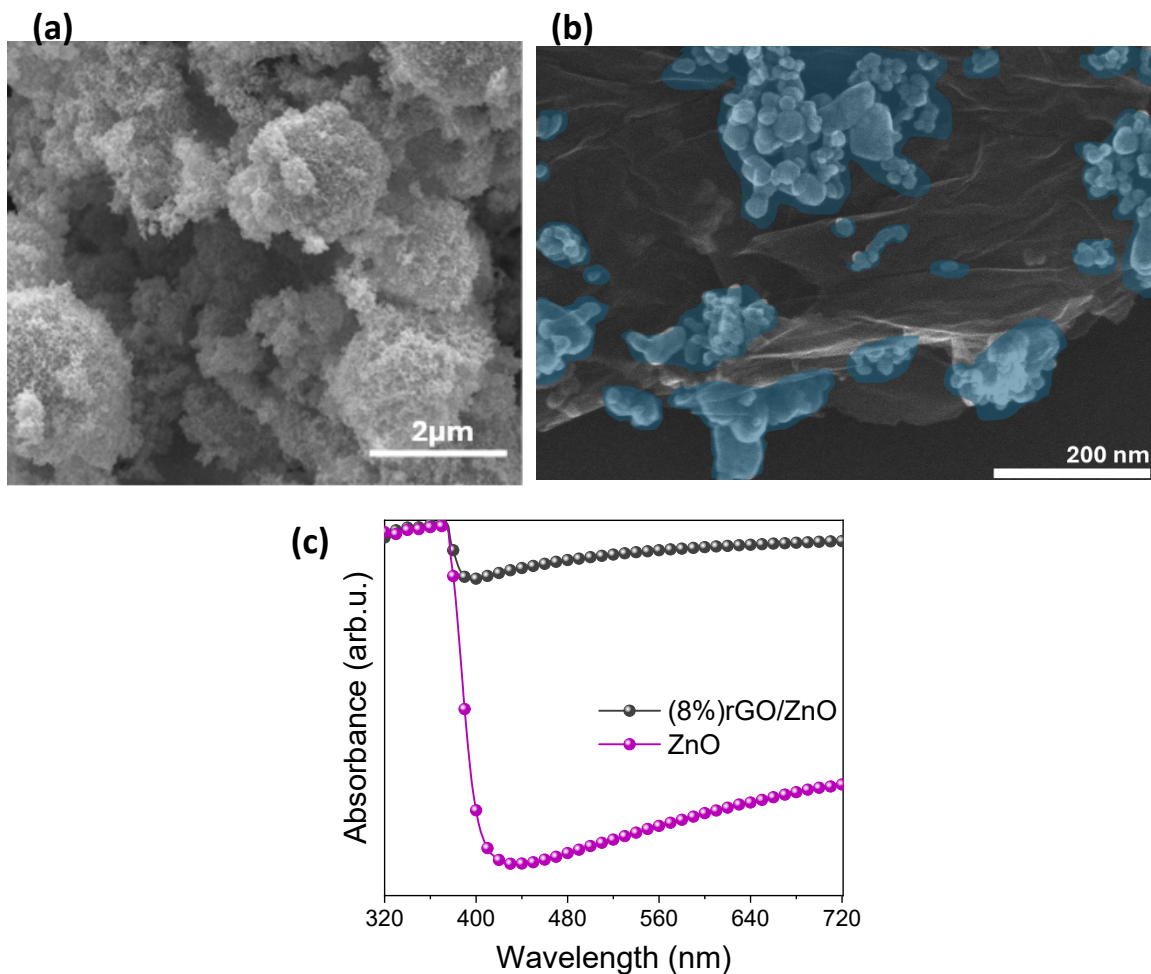

**Fig. S1.** (a) High magnification SEM image of ZnO nanoflake, (b) SEM image of (16%)rGO/ZnO composite (Blue colored areas represent ZnO), (c) Comparative UV-VIS absorption curves of the pristine ZnO nanoflakes and the (8%)rGO/3D ZnO composite.

**Table S1.** PL peaks deconvolution emission percentages.

| Emissions | (32%)rGO/3D ZnO (%) | (16%)rGO/3D ZnO (%) | (8%)rGO/3D ZnO (%) |
|-----------|---------------------|---------------------|--------------------|
| UV        | 53                  | 36                  | 38                 |
| Blue      | 26                  | 43                  | 43                 |
| Green     | 11                  | 6                   | 6                  |
| Yellow    | 10                  | 15                  | 13                 |

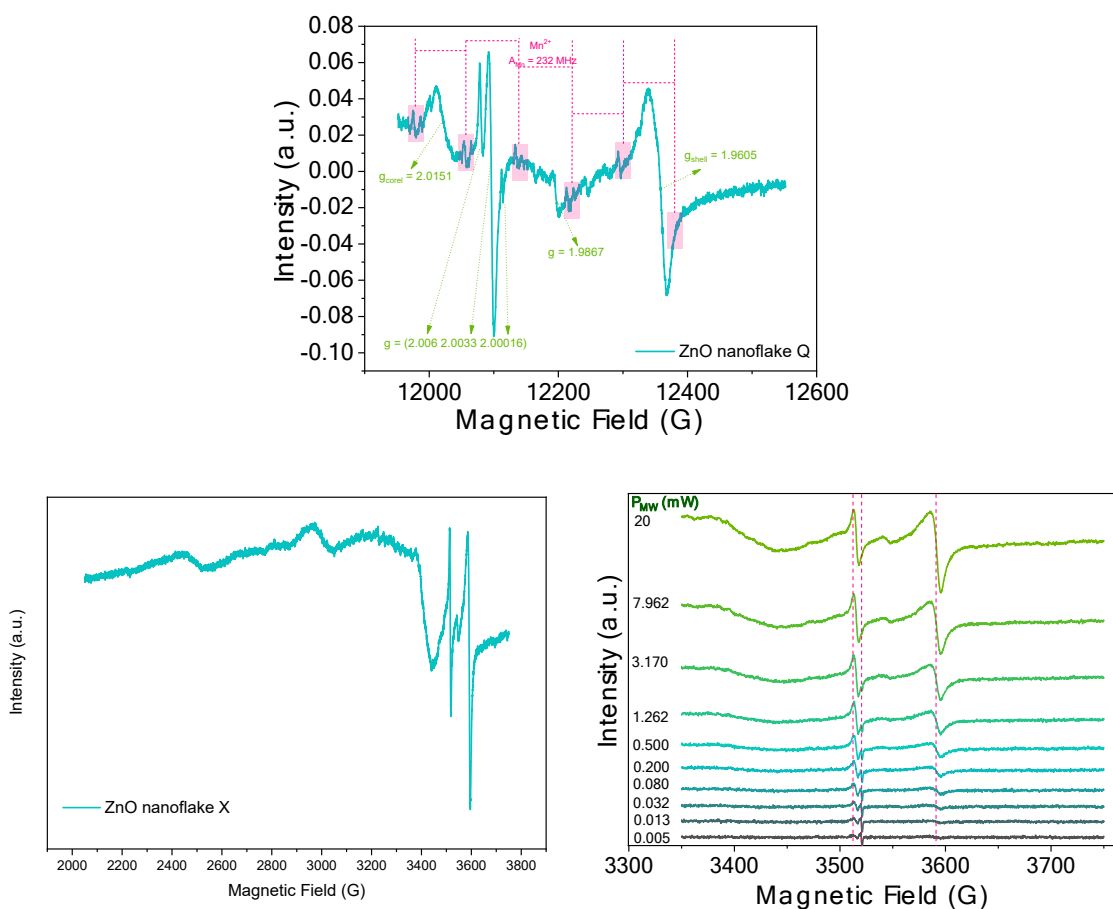

**Fig. S2.** EPR analysis results for the pristine 3D ZnO nanoflake; (a) at the Q-band, (b) at the X-band, (c) change in signals depending on power intensity.

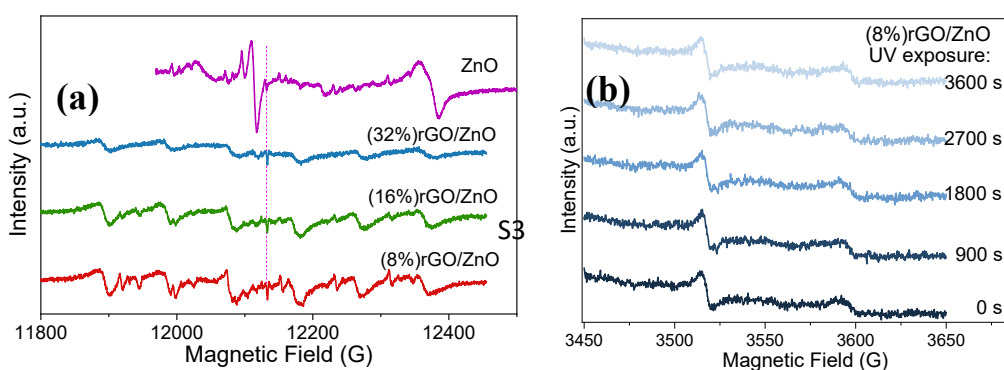

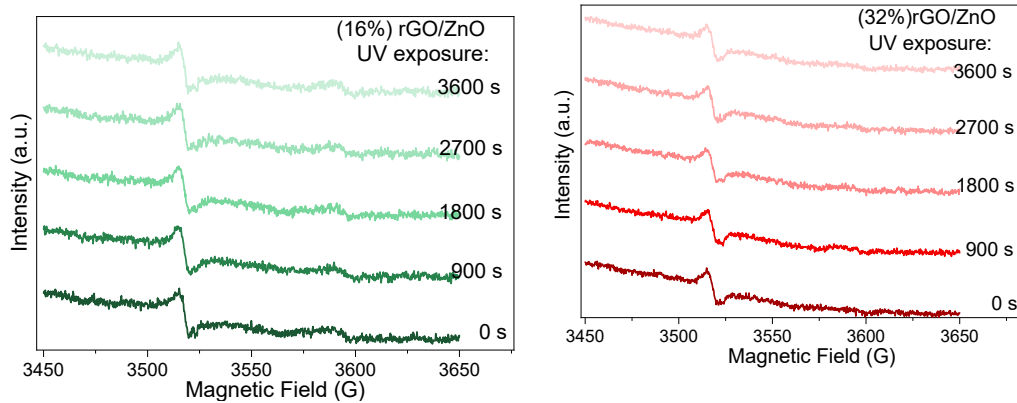

**Fig. S3.** EPR analysis results for the composite powders

**Equations for (Photo)electrochemical measurements**

The areal capacitance ( $C_A$ ) of the PSC devices was estimated from the CV curves using Equation (1)<sup>1</sup>

$$C_{A,CV} = \frac{I \int dV}{A \nu \Delta V^2} \quad (1)$$

where  $\int I dV$  is the area under the curve calculated from CV,  $\nu$  is the scan rate,  $\Delta V$  is the potential window, and  $A$  is the active area of the electrode.

$C_A$  can be calculated from GCD curves using the following equation,

$$C_{A,GCD} = \frac{I \Delta V}{A \nu} \quad (2)$$

Herein,  $I$  is the applied current,  $A$  is the active area of the electrode,  $\Delta t$  is the time for discharging process and  $V$  is the potential window. The areal energy density ( $E_A$ ,  $\mu\text{Whcm}^{-2}$ ) and power density ( $P_A$ ,  $\text{mWcm}^{-2}$ ) of the electrodes were estimated using the equation (3) and (4), respectively.<sup>2</sup>

$$E_A = \frac{0.5 \times C_A \times V^2}{3600} \quad (3)$$

$$P_A = \frac{E_A \times 3600}{\Delta t} \quad (4)$$

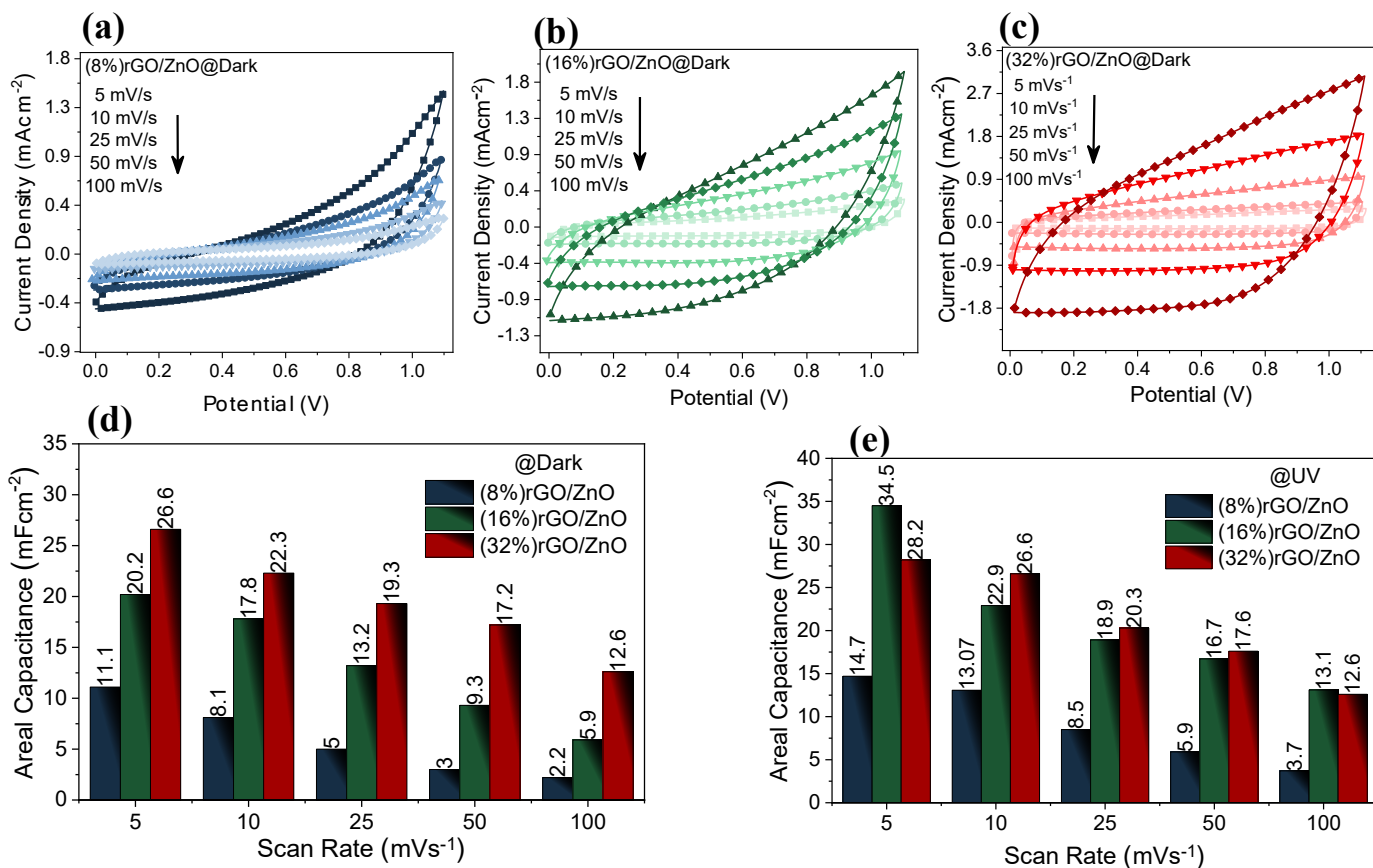

**Fig. S4.** Dark CV scans at various scan rates for the (a) (8%)rGO/3D ZnO, (b) (16%)rGO/3D ZnO, (c) (32%)rGO/3D ZnO, Calculated  $C_A$  values depending on the scan rates (d) in the dark and (e) under UV illumination.

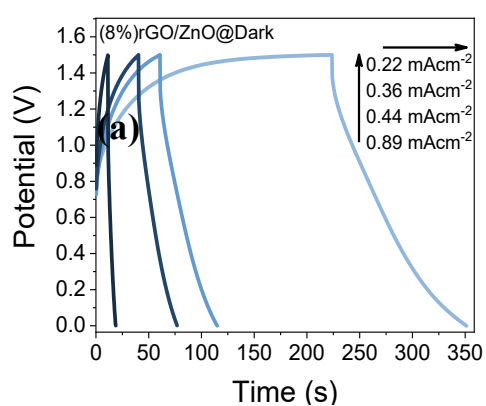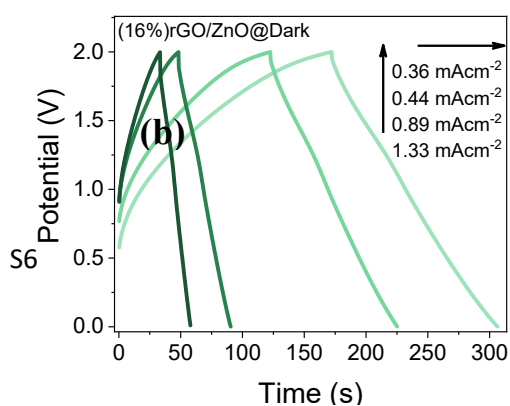

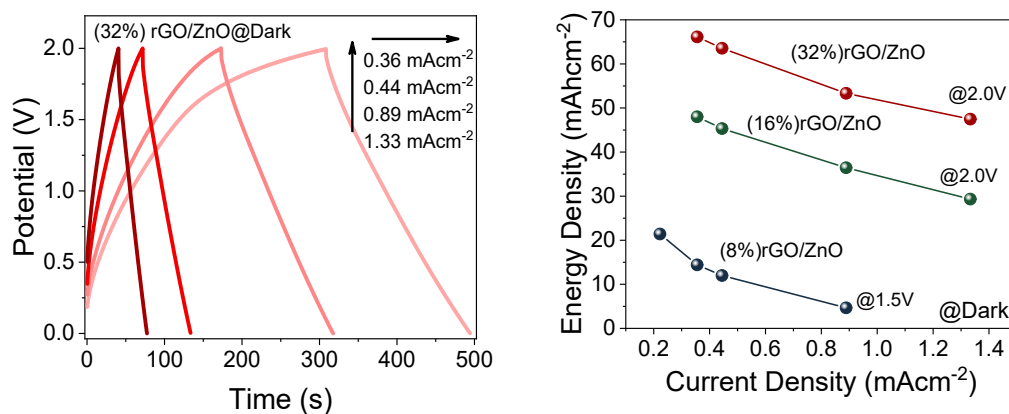

**Fig. S5.** Dark condition GCD curves at various current densities of the composite PSC devices; (a) (8%)rGO/3D ZnO, (b) (16%)rGO/3D ZnO, (c) (32%)rGO/3D ZnO, (d) comparison of the calculated Ed values depending on applied current densities in the dark condition (The PSC device prepared with the least rGO composition could not reach 2.0V).

**Table S2.** Values of EC circuit elements of the PSC devices

| PSC device      | UV condition | R1( $\Omega$ ) | a1    | R2( $\Omega$ ) | S2 ( $\Omega s^{-1/2}$ ) | C3(F)                  | R3( $\Omega$ )       |
|-----------------|--------------|----------------|-------|----------------|--------------------------|------------------------|----------------------|
| (8%)RGO/3D ZnO  | on           | 41.09          | 0.584 | 62.76          | 113.8                    | $41.42 \times 10^{-6}$ | 7.76                 |
| (16%)RGO/3D ZnO |              | 23.02          | 0.749 | 21.74          | 44.59                    | 0.069                  | $2.1 \times 10^{15}$ |
| (32%)RGO/3D ZnO |              | 20.96          | 0.680 | 12.41          | 16.77                    | 0.044                  | $1.3 \times 10^{15}$ |
| (8%)RGO/3D ZnO  | off          | 39.20          | 0.613 | 128.3          | 194.2                    | $68.1 \times 10^{-6}$  | 10.01                |
| (16%)RGO/3D ZnO |              | 23.04          | 0.788 | 42.18          | 68.76                    | 0.043                  | 3.1                  |
| (32%)RGO/3D ZnO |              | 20.90          | 0.734 | 19.34          | 20.42                    | 0.036                  | 44070                |

\* The variable  $a$  ( $0 < a < 1$ ) is the order of the CPE.

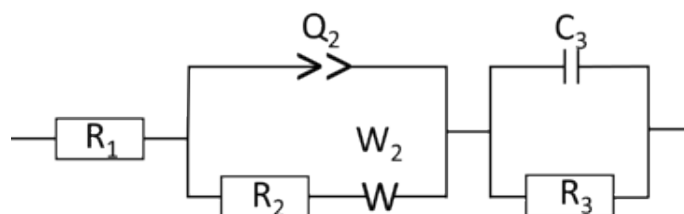

**Fig. S6.** EC circuit of the PSC devices.



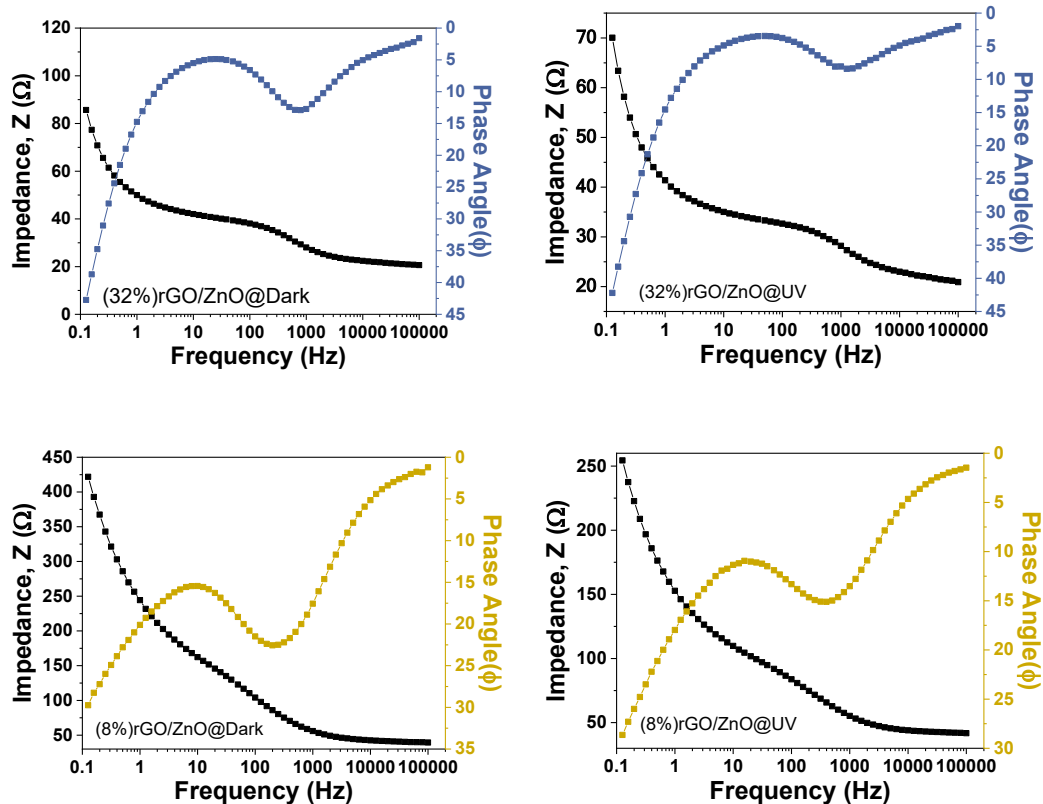

**Fig. S7.** Bode plots of (8%)rGO/3D ZnO and (32%)rGO/3D ZnO-based PSC devices under UV and dark conditions.

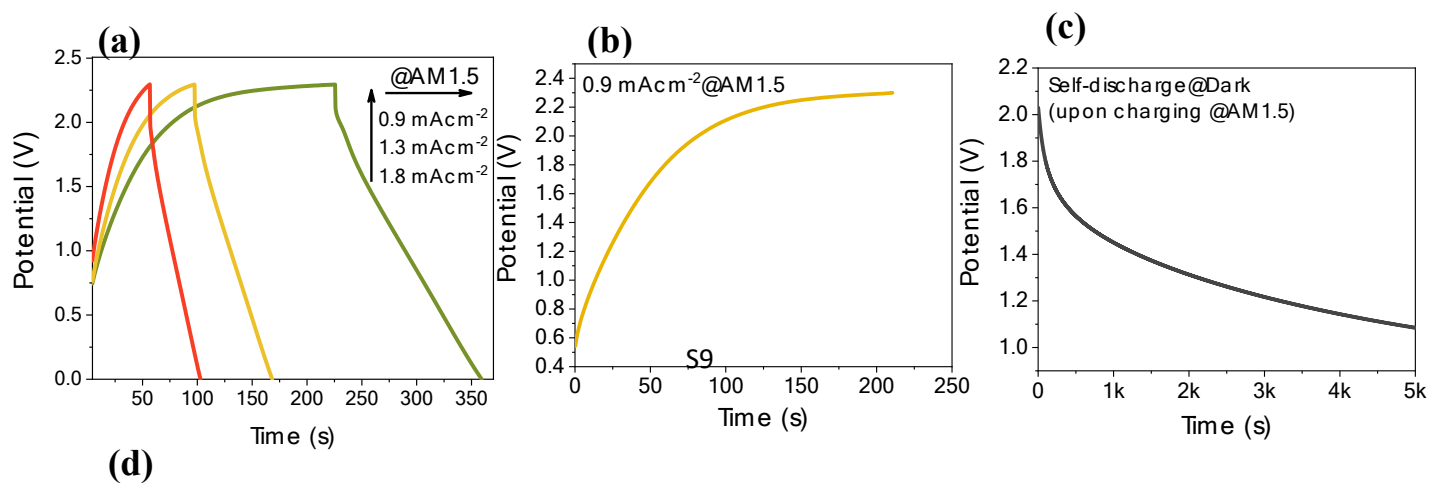

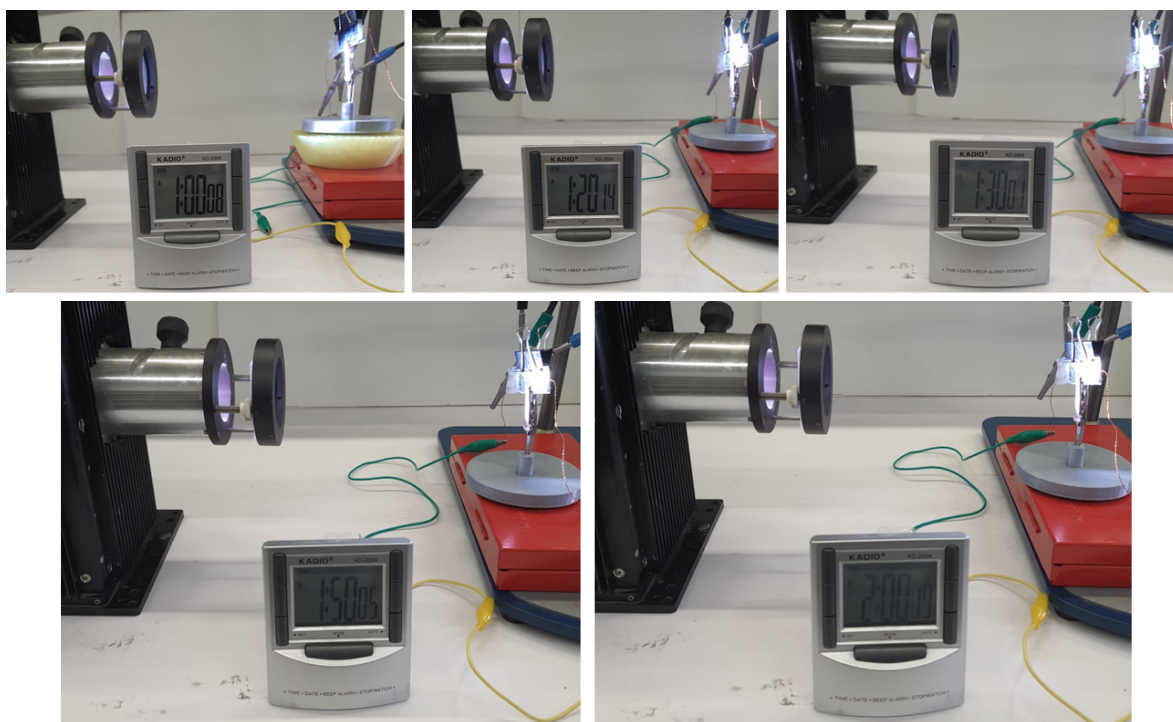

**Fig. S8.** Proof of concept experiments; (a) GCD curves at various current densities under AM 1.5 light irradiation, (b) Charging at  $0.9 \text{ mAcm}^{-2}$  under AM 1.5 light irradiation, (c) self-discharge process in the dark after charging at  $0.9 \text{ mAcm}^{-2}$  under AM 1.5 light irradiation, (c) Photographs of powering a standard digital clock after charging  $0.9 \text{ mAcm}^{-2}$  ( $0.2 \text{ Ag}^{-1}$ ) under AM 1.5 light irradiation.
